# Supplementary material for: Validating a Curvature‐Based Marker of Cervical Carotid Tortuosity for Risk Assessment in Heritable Aortopathies
Source: PubMed Central journal article supplement — J Am Heart Assoc. 2024 Jun 21;13(13):e035171. doi: 10.1161/JAHA.124.035171 (PMC11255721; doi:10.1161/jaha.124.035171), 2024-06-21
Supplement: JAH3-13-e035171-s001.pdf [file JAH3-13-e035171-s001.pdf]

# **SUPPLEMENTAL MATERIAL**

## **Data S1.**

### **Supplemental Results: Comparing changes in carotid tortuosity from a time series analysis.**

We performed the one-way ANOVA test to compare the effect of time on change in cervical carotid tortuosity for our three variables: tortuosity index, total absolute curvature, and RMS curvature.

A one-way ANOVA indicated that there is a significant difference in change in tortuosity index between the different groups ( $F(5,94)=2.52$ ,  $p=0.034$ ). Although the ANOVA test identified that the means are not statistically equal, the post-hoc Tukey's HSD test for multiple comparisons do not show enough evidence for a statistical difference between any pair of groups (**Table S1**). It is possible that a combined mean of more than one group differs significantly from the mean of one group or from the mean of other combined mean.

A one-way ANOVA indicated that there is a significant difference in change in total absolute curvature between the different groups ( $F(5,94)=2.34$ ,  $p=0.047$ ). Although the ANOVA test identified that the means are not statistically equal, the post-hoc Tukey's HSD test for multiple comparisons do not show enough evidence for a statistical difference between any pair of groups (**Table S2**). It is possible that a combined mean of more than one group differs significantly from the mean of one group or from the mean of other combined mean.

A one-way ANOVA indicated that there is not a significant difference in change in RMS curvature between the different groups ( $F(5,94)=1.99$ ,  $p=0.087$ ). There is no significant difference between the means of any pair of groups (**Table S3**).

**Table S1. Tukey's post-hoc multiple comparisons table for change in tortuosity index.**

| Group1       | Group2        | Mean difference | Q     | 95% CI      |             | p-value |
|--------------|---------------|-----------------|-------|-------------|-------------|---------|
|              |               |                 |       | Lower limit | Upper limit |         |
| Baseline     | 0-24 months   | 0.068           | 0.418 | -0.600      | 0.735       | 1.000   |
| Baseline     | 24-48 months  | 0.477           | 3.433 | -0.095      | 1.049       | 0.158   |
| Baseline     | 48-72 months  | 0.272           | 2.052 | -0.273      | 0.817       | 0.696   |
| Baseline     | 72-96 months  | 0.642           | 3.715 | -0.069      | 1.352       | 0.101   |
| Baseline     | 96-120 months | 0.302           | 1.748 | -0.409      | 1.013       | 0.818   |
| 0-24 months  | 24-48 months  | 0.545           | 3.251 | -0.145      | 1.234       | 0.205   |
| 0-24 months  | 48-72 months  | 0.340           | 2.093 | -0.328      | 1.007       | 0.678   |
| 0-24 months  | 72-96 months  | 0.710           | 3.611 | -0.099      | 1.518       | 0.120   |
| 0-24 months  | 96-120 months | 0.370           | 1.882 | -0.439      | 1.178       | 0.767   |
| 24-48 months | 48-72 months  | 0.205           | 1.476 | -0.367      | 0.777       | 0.902   |

|                 |                  |       |       |        |       |       |
|-----------------|------------------|-------|-------|--------|-------|-------|
| 24-48<br>months | 72-96<br>months  | 0.165 | 0.927 | -0.567 | 0.896 | 0.986 |
| 24-48<br>months | 96-120<br>months | 0.175 | 0.984 | -0.556 | 0.906 | 0.982 |
| 48-72<br>months | 72-96<br>months  | 0.370 | 2.141 | -0.341 | 1.081 | 0.656 |
| 48-72<br>months | 96-120<br>months | 0.030 | 0.175 | -0.681 | 0.741 | 1.000 |
| 72-96<br>months | 96-120<br>months | 0.340 | 1.655 | -0.505 | 1.184 | 0.850 |

**Table S2. Tukey's post-hoc multiple comparisons table for change in total absolute curvature.**

| Group1      | Group2        | Mean difference | Q     | 95% CI      |             | p-value |
|-------------|---------------|-----------------|-------|-------------|-------------|---------|
|             |               |                 |       | Lower limit | Upper limit |         |
| Baseline    | 0-24 months   | 0.029           | 0.551 | -0.187      | 0.245       | 0.999   |
| Baseline    | 24-48 months  | 0.115           | 2.565 | -0.07       | 0.300       | 0.462   |
| Baseline    | 48-72 months  | 0.045           | 1.056 | -0.131      | 0.222       | 0.975   |
| Baseline    | 72-96 months  | 0.221           | 3.954 | -0.009      | 0.451       | 0.067   |
| Baseline    | 96-120 months | 0.026           | 0.461 | -0.204      | 0.256       | 1.000   |
| 0-24 months | 24-48 months  | 0.144           | 2.659 | -0.079      | 0.368       | 0.421   |
| 0-24 months | 48-72 months  | 0.074           | 1.413 | -0.142      | 0.290       | 0.917   |
| 0-24 months | 72-96 months  | 0.250           | 3.930 | -0.012      | 0.512       | 0.070   |
| 0-24 months | 96-120 months | 0.055           | 0.860 | -0.207      | 0.316       | 0.990   |

|                 |                  |       |       |        |        |       |
|-----------------|------------------|-------|-------|--------|--------|-------|
| 24-48<br>months | 48-72<br>months  | 0.070 | 1.558 | -0.115 | 0.255  | 0.880 |
| 24-48<br>months | 72-96<br>months  | 0.106 | 1.838 | -0.131 | 0.343  | 0.785 |
| 24-48<br>months | 96-120<br>months | 0.090 | 1.556 | -0.147 | 0.326  | 0.880 |
| 48-72<br>months | 72-96<br>months  | 0.176 | 3.144 | -0.054 | 0.406  | 0.237 |
| 48-72<br>months | 96-120<br>months | 0.019 | 0.349 | -0.211 | 0.250  | 1.000 |
| 72-96<br>months | 96-120<br>months | 0.195 | 2.940 | -0.078 | 0.4687 | 0.307 |

**Table S3. Tukey's post-hoc multiple comparisons table for change in RMS curvature.**

| Group1       | Group2        | Mean difference | Q     | 95% CI      |             | p-value |
|--------------|---------------|-----------------|-------|-------------|-------------|---------|
|              |               |                 |       | Lower limit | Upper limit |         |
| Baseline     | 0-24 months   | 0.001           | 0.020 | -0.187      | 0.189       | 1.000   |
| Baseline     | 24-48 months  | 0.101           | 2.594 | -0.059      | 0.262       | 0.449   |
| Baseline     | 48-72 months  | 0.010           | 0.258 | -0.144      | 0.163       | 1.000   |
| Baseline     | 72-96 months  | 0.154           | 3.171 | -0.046      | 0.354       | 0.229   |
| Baseline     | 96-120 months | 0.030           | 0.626 | -0.169      | 0.230       | 0.998   |
| 0-24 months  | 24-48 months  | 0.100           | 2.131 | -0.093      | 0.294       | 0.661   |
| 0-24 months  | 48-72 months  | 0.009           | 0.190 | -0.179      | 0.196       | 1.000   |
| 0-24 months  | 72-96 months  | 0.153           | 2.771 | -0.074      | 0.380       | 0.374   |
| 0-24 months  | 96-120 months | 0.031           | 0.567 | -0.196      | 0.259       | 0.999   |
| 24-48 months | 48-72 months  | 0.092           | 2.348 | -0.069      | 0.252       | 0.561   |



|                 |                  |       |       |        |       |       |
|-----------------|------------------|-------|-------|--------|-------|-------|
| 24-48<br>months | 72-96<br>months  | 0.053 | 1.054 | -0.153 | 0.258 | 0.976 |
| 24-48<br>months | 96-120<br>months | 0.132 | 2.636 | -0.074 | 0.337 | 0.431 |
| 48-72<br>months | 72-96<br>months  | 0.144 | 2.974 | -0.055 | 0.344 | 0.295 |
| 48-72<br>months | 96-120<br>months | 0.040 | 0.824 | -0.160 | 0.240 | 0.992 |
| 72-96<br>months | 96-120<br>months | 0.184 | 3.196 | -0.053 | 0.422 | 0.221 |
